# Supplementary material for: Evaluating the efficacy of wearable biofeedback on the outcomes of exercise interventions in people with chronic non-specific spinal pain: protocol for a systematic review and meta-analysis
Source: HighWire-hosted journal article supplement (doi:10.1136/bmjopen-2024-085206), 2024-07-01
Supplement: bmjopen-2024-085206supp001_data_supplement.pdf [file bmjopen-2024-085206supp001_data_supplement.pdf]

## Supplemental material

### Search Syntax for Medline (Ovid)

1. Pain.ti,ab.
2. Feedback.m\_titl.
3. Biofeedback.mp
4. Sensor feedback.mp
5. Biofeedback, Psychology/is, mt, ph [Instrumentation, Methods, Physiology]
6. Feedback, Psychological/ or Feedback/ or Feedback, Physiological/
7. Treatment outcome\*.mp
8. Disability evaluation.mp
9. Recovery of function.mp
10. Function\* recovery.mp
11. Physical recovery.mp
12. Pain measurement.mp
13. Physical functional performance.mp
14. 2-6 (OR)
15. 7-13 (OR)
16. 1 AND 14 AND 15

### Search Syntax for Embase (Ovid)

1. Pain.ti,ab.
2. Feedback.m\_titl.
3. Biofeedback.mp
4. Sensor feedback.mp
5. Biofeedback/
6. Feedback, Psychological/ or Feedback/ or Feedback, Physiological/
7. Treatment outcome\*.mp
8. Disability evaluation.mp
9. Recovery of function.mp
10. Function\* recovery.mp
11. Physical recovery.mp
12. Pain measurement.mp
13. Physical functional performance.mp
14. 2-6 (OR)
15. 7-13 (OR)
16. 1 AND 14 AND 15

#### Search Syntax for APA PsycInfo (Ovid)

1. Pain.ti,ab.
2. Feedback.m\_titl.
3. Biofeedback.mp.
4. Sensor Feedback.mp.
5. [Biofeedback, Psychology/is, mt, ph [Instrumentation, Methods, Physiology]]
6. Feedback, Psychological/ or Feedback/ or Feedback, Physiological/
7. Treatment outcome\*.mp.
8. Disability evaluation.mp.
9. Recovery of function.mp.
10. Function\* recovery.mp.
11. Physical recovery.mp.
12. Pain measurement.mp.
13. Physical functional performance\*.mp.
14. 2-6 (OR)
15. 7-13 (OR)
16. 1 AND 14 AND 15

### Search Syntax for PubMed

1. Pain [Title/Abstract]

2. Feedback [Title/Abstract]
3. Feedback [All Fields]
4. Biofeedback [All Fields]
5. Sensor feedback [All Fields]
6. Biofeedback, psychology/instrumentation [MeSH Terms]
7. Biofeedback, psychology/method\* [MeSH Terms]
8. Biofeedback, psychology/physiology [MeSH Terms]
9. Feedback [MeSH Terms]
10. Treatment outcome [All Fields]
11. Disability evaluation [All Fields]
12. Recovery of function [All Fields]
13. Function\* recovery [All Fields]
14. Physical recovery [All Fields]
15. Pain measurement [All Fields]
16. Physical functional performance [All Fields]
17. 2-9 (OR)
18. 10-16 (OR)
19. 1 AND 17 AND 18

#### **Search Syntax for Cinahl PLUS (EBSCO)**

1. TI Pain
2. AB Pain

3. TI Feedback
4. AB Feedback
5. "Biofeedback"
6. "Feedback"
7. "Sensor feedback"
8. (MH "Treatment outcome")
9. "Treatment outcome"
10. (MH "Disability Evaluation")
11. "Disability Evaluation"
12. "Recovery of function"
13. "Function\* recovery"
14. "Physical recovery"
15. (MH "Pain measurement")
16. "Pain measurement"
17. (MH "Physical Performance")
18. "Physical functional performance"
19. 1-2 (OR)
20. 3-7 (OR)
21. 8-18 (OR)
22. 19 AND 20 AND 21

#### Search Syntax for AMED (EBSCO)

1. TI Pain
2. AB Pain
3. TI Feedback

4. AB Feedback
5. "Biofeedback"
6. "Feedback"
7. "Sensor feedback"
8. (MH "Treatment outcome")
9. "Treatment outcome"
10. (MH "Disability Evaluation")
11. "Disability Evaluation"
12. "Recovery of function"
13. "Function\* recovery"
14. "Physical recovery"
15. (MH "Pain measurement")
16. "Pain measurement"
17. (MH "Physical Performance")
18. "Physical functional performance"
19. 1-2 (OR)
20. 3-7 (OR)
21. 8-18 (OR)
22. 19 AND 20 AND 21

#### **Search Syntax for SPORTDiscus (EBSCO)**

1. TI Pain
2. AB Pain
3. TI Feedback
4. AB Feedback

5. "Biofeedback"
6. "Feedback"
7. "Sensor feedback"
8. (MH "Treatment outcome")
9. "Treatment outcome"
10. (MH "Disability Evaluation")
11. "Disability Evaluation"
12. "Recovery of function"
13. "Function\* recovery"
14. "Physical recovery"
15. (MH "Pain measurement")
16. "Pain measurement"
17. (MH "Physical Performance")
18. "Physical functional performance"
19. 1-2 (OR)
20. 3-7 (OR)
21. 8-18 (OR)
22. 19 AND 20 AND 21

### Search Syntax for Web of Science

1. TS=(Pain)
2. TS=(Feedback)
3. TS=(Biofeedback)
4. TS=(Sensor feedback)
5. TS=(Treatment outcome\*)

6. TS=(Disability evaluation\*)
7. TS=(Recovery of function)
8. TS=(Function\* recovery)
9. TS=(Physical recovery)
10. TS=(Pain measurement)
11. TS=(Physical functional performance)
12. 2-4 (OR)
13. 5-11 (OR)
14. 1 AND 12 AND 13

### Search Syntax for Cochrane Central

1. (pain):ti,ab,kw
2. (Biofeedback):ti,ab,kw
3. MeSH descriptor: [Biofeedback, Psychology] explode all trees
4. (Feedback):ti,ab,kw
5. MeSH descriptor: [Feedback, Psychological] explode all trees
6. MeSH descriptor: [Feedback, Physiological] explode all trees



7. (sensor feedback):ti,ab,kw
8. (Treatment outcome):ti,ab,kw
9. MeSH descriptor: [Treatment Outcome] explode all trees
10. (Disability evaluation):ti,ab,kw
11. MeSH descriptor: [Disability Evaluation] explode all trees
12. (Recovery of function):ti,ab,kw
13. MeSH descriptor: [Recovery of Function] explode all trees
14. (function\* recovery):ti,ab,kw
15. (Physical recovery):ti,ab,kw
16. (Pain measurement):ti,ab,kw
17. MeSH descriptor: [Pain Measurement] explode all trees
18. (Physical functional performance):ti,ab,kw
19. MeSH descriptor: [Physical Functional Performance] explode all trees
20. 2-7 (OR)
21. 8-19 (OR)
22. 1 AND 20 AND 21

### Websites for Grey literature & Hand searching

**ProQuest:** <https://www.proquest.com/index>

**OpenGrey:** <https://opengrey.eu>

**Hand searching:** <https://www.sciencedirect.com>, <https://onlinelibrary.wiley.com> or by using the site of the specified Journal.
